# Supplementary material for: p–n junction formation between CoPi and α-Fe2O3 layers enhanced photo-charge separation and catalytic efficiencies for efficient visible-light-driven water oxidation
Source: Royal Society of Chemistry journal article supplement (doi:10.1039/d3se00346a), 2023-01-01
Supplement: d3se00346a1.pdf [file d3se00346a1.pdf]

## Supporting Information

### **p-n Junction formation between CoPi and $\alpha$ -Fe<sub>2</sub>O<sub>3</sub> layers enhances photo-charge separation and catalytic efficiencies for efficient visible light-driven water oxidation**

Tomohiro Katsuki,<sup>†</sup> Zaki N. Zahran,<sup>†, ‡\*</sup> Yuta Tsubonouchi,<sup>†</sup> Debraj Chandra,<sup>†</sup> Norihisa Hoshino<sup>†</sup> and Masayuki Yagi<sup>†\*</sup>.

<sup>†</sup>Department of Materials Science and Technology, Faculty of Engineering, Niigata University, 8050 Ikarashi-2, Niigata 9050-2181, Japan.

<sup>‡</sup>Faculty of Science, Tanta University, Tanta 5111, Egypt.

\*Correspondence to: [yagi@eng.niigata-u.ac.jp](mailto:yagi@eng.niigata-u.ac.jp) and [znzahran@eng.niigata-u.ac.jp](mailto:znzahran@eng.niigata-u.ac.jp)

### **Contents**

□ □

**Table S1** Summary of PEC performances of the state-of-the-art  $\alpha$ -Fe<sub>2</sub>O<sub>3</sub>/CoPi-based electrodes.

**Figure S1** Nyquist plots and fitting curves for (a)  $\alpha$ -Fe<sub>2</sub>O<sub>3</sub> and (b)  $\alpha$ -Fe<sub>2</sub>O<sub>3</sub>/CoPi electrodes.

**Table S2** Summary of Fitting parameter provided by PEIS analysis.

**Table S1** Summary of PEC water oxidation performances of the state-of-the-art  $\alpha$ -Fe<sub>2</sub>O<sub>3</sub>/CoPi-based electrodes.<sup>a)</sup>

| Electrodes <sup>b)</sup>                                                               | Preparation Method | $E_{\text{on}}$ (V vs. RHE) | $E_{\text{on}}$ shift <sup>c)</sup> (mV) | $\eta_{\text{sep}}$ (%) <sup>d)</sup> | $\eta_{\text{cat}}$ (%) <sup>d)</sup> | IPCE <sub>420</sub> (%) <sup>d)</sup> | ABPE <sub>max</sub> (%) | Ref.      |
|----------------------------------------------------------------------------------------|--------------------|-----------------------------|------------------------------------------|---------------------------------------|---------------------------------------|---------------------------------------|-------------------------|-----------|
| $\alpha$ -Fe <sub>2</sub> O <sub>3</sub> /CoPi                                         | Casting            | 0.65 <sup>e)</sup>          | 200 <sup>e)</sup>                        | 33 <sup>f)</sup>                      | 70 <sup>f)</sup>                      | 20                                    | 1.2 <sup>f)</sup>       | This work |
| Ga <sub>2</sub> O <sub>3</sub> / $\alpha$ -Fe <sub>2</sub> O <sub>3</sub> /CoPi        | ALD                | 0.60 <sup>g)</sup>          | 100 <sup>g)</sup>                        | na                                    | na                                    | na                                    | na                      | R1        |
| $\alpha$ -Fe <sub>2</sub> O <sub>3</sub> -CF/CoPi                                      | APCVD              | 0.83                        | 170                                      | na                                    | na                                    | 40                                    | na                      | R2        |
| $\alpha$ -Fe <sub>2</sub> O <sub>3</sub> -CF/CoPi                                      | APCVD              | 0.80                        | 100                                      | na                                    | na                                    | 8                                     | na                      | R3        |
| $\alpha$ -Fe <sub>2</sub> O <sub>3</sub> -IO/CoPi                                      | ED                 | 0.88                        | 120                                      | na                                    | na                                    | 30 <sup>h)</sup>                      | na                      | R4        |
| $\alpha$ -Fe <sub>2</sub> O <sub>3</sub> -NRs/N-CoPi                                   | HT                 | 0.70                        | 50                                       | na                                    | na                                    | 7                                     | na                      | R5        |
| $\alpha$ -Fe <sub>2</sub> O <sub>3</sub> -CL/CoPi                                      | HT                 | 0.80                        | 110                                      | na                                    | na                                    | na                                    | na                      | R6        |
| $\alpha$ -Fe <sub>2</sub> O <sub>3</sub> -NRs/CoPi                                     | HT                 | 0.81                        | 110                                      | na                                    | na                                    | 12                                    | 0.12                    | R7        |
| $\alpha$ -Fe <sub>2</sub> O <sub>3</sub> -CL/CoPi-NaBH <sub>4</sub>                    | HT                 | 0.70                        | 100                                      | na                                    | na                                    | na                                    | 0.13                    | R6        |
| $\alpha$ -Fe <sub>2</sub> O <sub>3</sub> -PNs/CoPi                                     | HT                 | 0.68 <sup>i)</sup>          | 160 <sup>i)</sup>                        | 17 <sup>i)</sup>                      | 90 <sup>i)</sup>                      | na                                    | na                      | R8        |
| $\alpha$ -Fe <sub>2</sub> O <sub>3</sub> -NRs/CoPi                                     | HT                 | 0.80                        | ~200                                     | na                                    | 80                                    | 20                                    | 0.21                    | R9        |
| Co-Pi/CaFe <sub>2</sub> O <sub>3</sub> / $\alpha$ -Fe <sub>2</sub> O <sub>3</sub> BNRs | APCVD              | 0.64                        | 80                                       | na                                    | na                                    | na                                    | na                      | R10       |

<sup>a)</sup> Measured in a 1.0 M NaOH (pH 14.0) electrolyte solution, under 1 sun AM 1.5G, ALD: atomic layer deposition, na: not available, CF: cauliflower, APCVD: atmospheric pressure chemical vapor deposition, IO: inverse opal, ED: electrochemical deposition, NRs: nanorods, N-CoPi: nitrogen doped CoPi, HT: hydrothermal, CL: coralline, PNs: porous nanorods, BNRs: branched nanorods, <sup>b)</sup> coated on basal FTO electrodes, <sup>c)</sup> defined as the  $E_{\text{on}}$  difference between the  $\alpha$ -Fe<sub>2</sub>O<sub>3</sub> and  $\alpha$ -Fe<sub>2</sub>O<sub>3</sub>/CoPi electrodes, <sup>d)</sup> at 1.23 V vs. RHE, <sup>e)</sup> Xenon lamp (> 420 nm, 100 mW cm<sup>-2</sup>), <sup>f)</sup> monoclinic light (420 nm, 7.06 mW cm<sup>-2</sup>) from LED, <sup>g)</sup> 1.0 M KOH with HCl as supporting, <sup>h)</sup> at 0.5 V vs. Ag/AgCl (1.53 V vs RHE), <sup>i)</sup> 0.1 M KOH (pH 12.6)

## References:

- R1 O. Zandi and T. W. Hamann, *Journal of Physical Chemistry Letters*, 2014, **5**, 1522–1526.
- R2 D. K. Zhong, M. Cornuz, K. Sivula, M. Grätzel and D. R. Gamelin, *Energy Environ Sci*, 2011, **4**, 1759–1764.
- R3 D. K. Zhong, J. Sun, H. Inumaru and D. R. Gamelin, *J Am Chem Soc*, 2009, **131**, 6086–6087.
- R4 X. Shi, K. Zhang and J. H. Park, *Int J Hydrogen Energy*, 2013, **38**, 12725–12732.
- R5 H. Lee, K. H. Kim, W. H. Choi, B. C. Moon, H. J. Kong and J. K. Kang, *ACS Appl Mater Interfaces*, 2019, **11**, 44366–44374.
- R6 J. Xiao, L. Fan, F. Zhao, Z. Huang, S. F. Zhou and G. Zhan, *J Catal*, 2020, **381**, 139–149.
- R7 J. Xiao, L. Fan, Z. Huang, J. Zhong, F. Zhao, K. Xu, S. F. Zhou and G. Zhan, *Chinese Journal of Catalysis*, 2020, **41**, 1761–1771.
- R8 G. Liu, N. Li, Y. Zhao, M. Wang, R. Yao, F. Zhao, Y. Wu and J. Li, *ACS Sustain Chem Eng*, 2019, **7**, 11377–11385.
- R9 T. T. Li, Q. Zhou, J. Qian, Y. Hu and Y. Q. Zheng, *Electrochim Acta*, 2019, **307**, 92–99.
- R10 D. Chen, Z. Liu, Z. Guo, M. Ruan and W. Yan, *ChemSusChem*, 2019, **12**, 3286–3295.

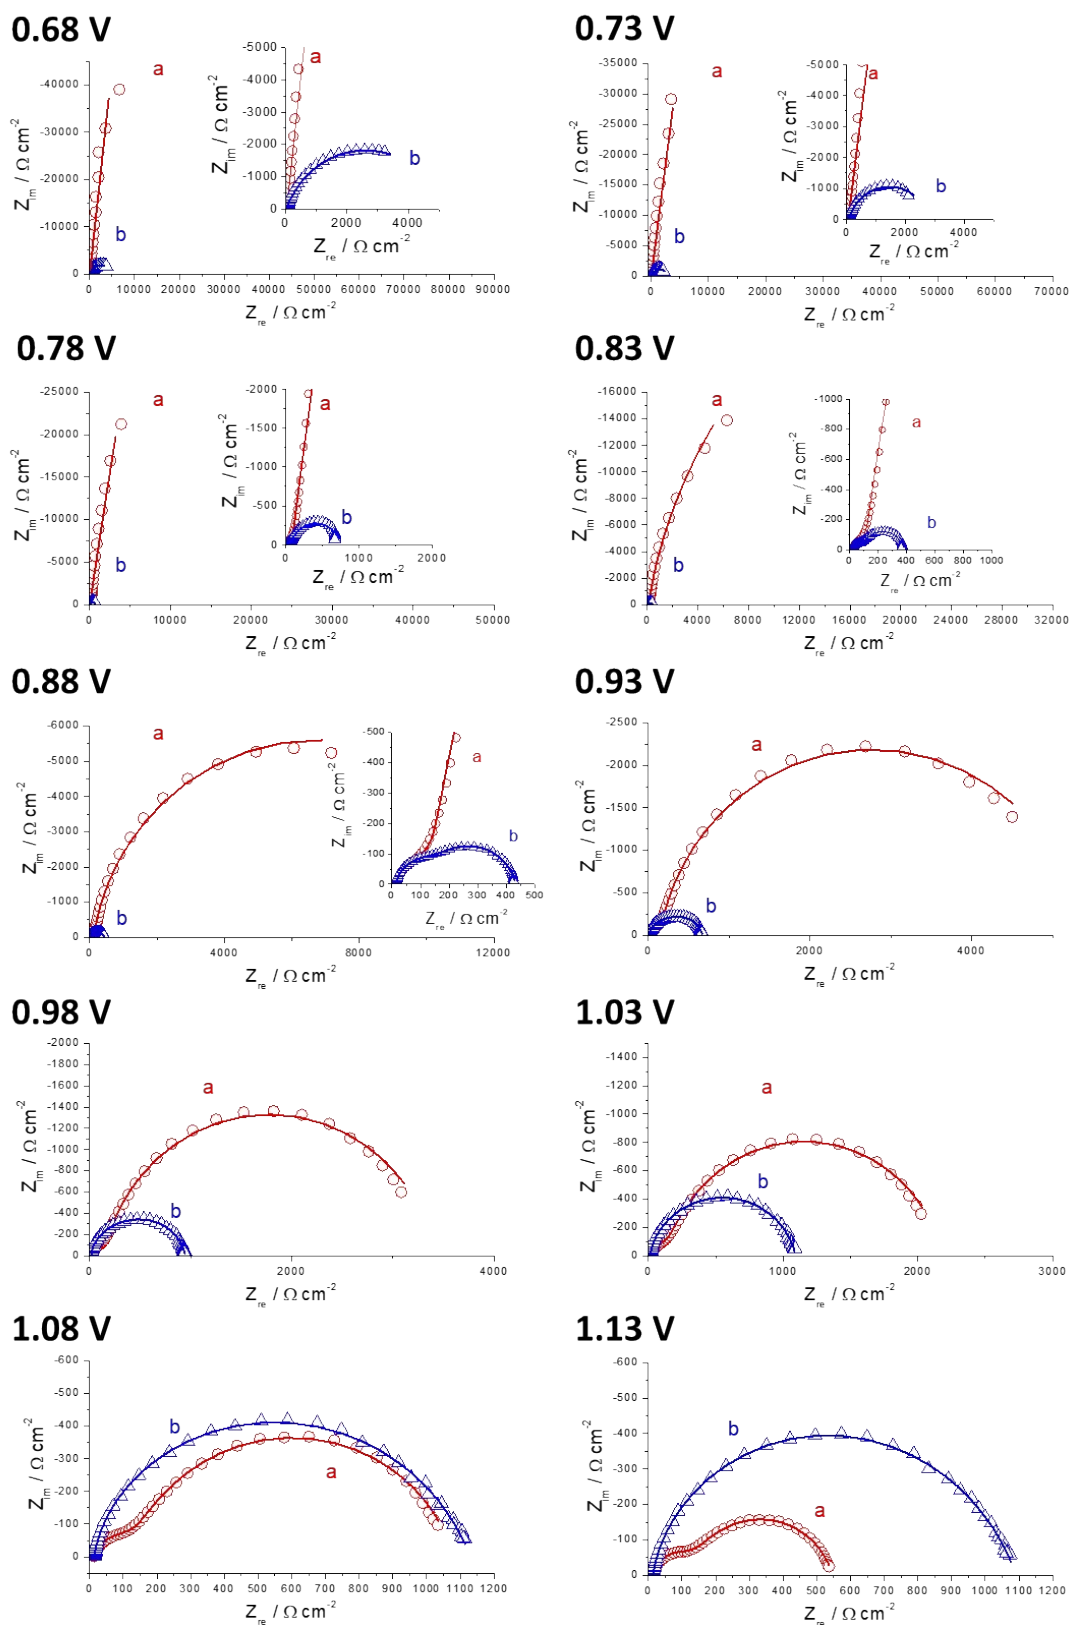

**Figure S1.** Nyquist plots and fitting curves using an equivalent circuit (inset of Figure 7A) for (a)  $\alpha\text{-Fe}_2\text{O}_3$  and (b)  $\alpha\text{-Fe}_2\text{O}_3/\text{CoPi}$  electrodes in a 1.0 M NaOH solution (pH 14.0) at frequencies from 100 mHz to 20 kHz at different potentials ( $E$ ) of 0.68-1.53 V vs RHE (-0.35 – 0.50 V vs Ag/AgCl) under visible light irradiation ( $>420 \text{ nm}$ ,  $100 \text{ mW cm}^{-2}$ ).

Figure S2 continued

**1.18 V**

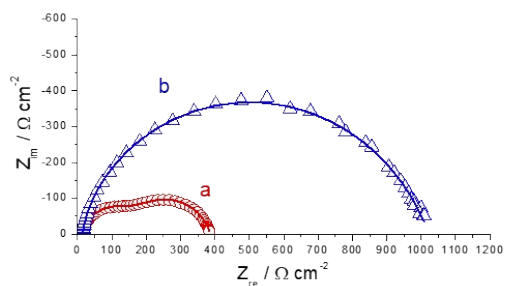

**1.23 V**

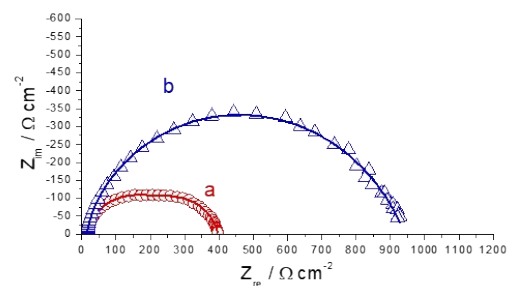

**1.28 V**

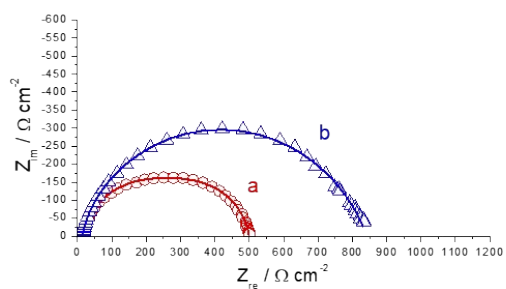

**1.33 V**

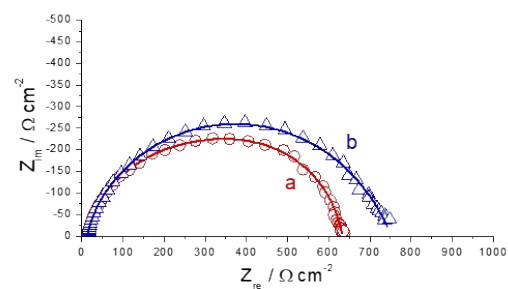

**1.38 V**

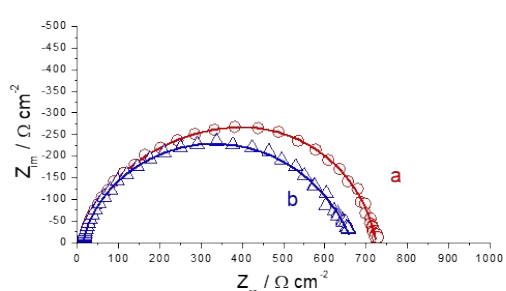

**1.43 V**

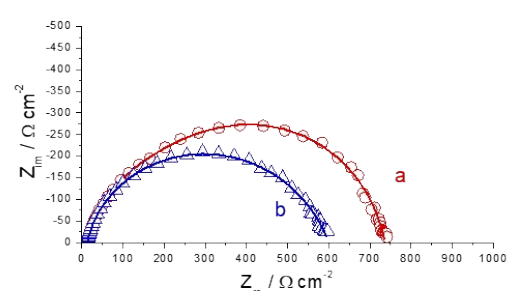

**1.48 V**

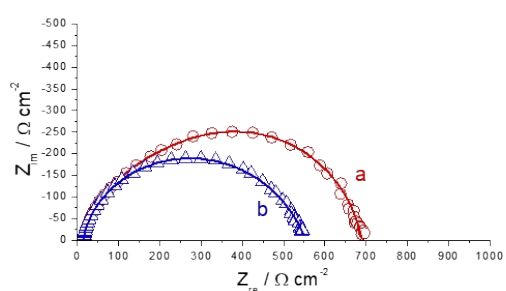

**1.53 V**

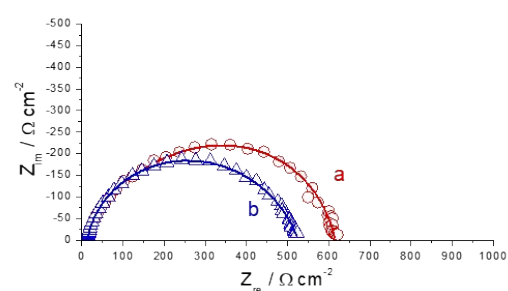

**Table S2** Fitting parameters of components of  $R_{\text{sol}}$ ,  $R_{\text{ct}}$  and CPE analyzed in the equivalent circuit (inset of Figure 7A) at different potentials ( $E$ ) for  $\alpha\text{-Fe}_2\text{O}_3$  and  $\alpha\text{-Fe}_2\text{O}_3/\text{CoPi}$  electrodes.

| $\alpha\text{-Fe}_2\text{O}_3$ electrode | High frequency |                               |                                            |                                                            | Low frequency         |                                            |                                                            |     |
|------------------------------------------|----------------|-------------------------------|--------------------------------------------|------------------------------------------------------------|-----------------------|--------------------------------------------|------------------------------------------------------------|-----|
|                                          | $E$ vs RHE     | $R_{\text{sol}}$ [ $\Omega$ ] | CPE <sup>bulk</sup>                        |                                                            |                       | CPE <sup>surf</sup>                        |                                                            |     |
|                                          |                |                               | $R_{\text{ct}}^{\text{bulk}}$ [ $\Omega$ ] | $T_{\text{CPE}}^{\text{bulk}}$ [ $\mu\text{F s}^{(p-1)}$ ] | $p$                   | $R_{\text{ct}}^{\text{surf}}$ [ $\Omega$ ] | $T_{\text{CPE}}^{\text{surf}}$ [ $\mu\text{F s}^{(p-1)}$ ] | $p$ |
| 0.68                                     | 14.5           | 132                           | 27.7                                       | 0.921                                                      | $5.17 \times 10^{13}$ | 13.4                                       | 0.942                                                      |     |
| 0.73                                     | 14.4           | 193                           | 34.7                                       | 0.888                                                      | $6.07 \times 10^9$    | 20.3                                       | 0.962                                                      |     |
| 0.78                                     | 14.1           | 201                           | 42.5                                       | 0.851                                                      | $7.82 \times 10^6$    | 33.5                                       | 0.966                                                      |     |
| 0.83                                     | 13.7           | 221                           | 51.0                                       | 0.817                                                      | $7.77 \times 10^4$    | 48.9                                       | 0.965                                                      |     |
| 0.88                                     | 13.5           | 250                           | 50.2                                       | 0.809                                                      | $1.33 \times 10^4$    | 62.0                                       | 0.950                                                      |     |
| 0.93                                     | 13.4           | 298                           | 47.7                                       | 0.808                                                      | 5120                  | 64.9                                       | 0.929                                                      |     |
| 0.98                                     | 13.3           | 302                           | 46.1                                       | 0.806                                                      | 3120                  | 69.8                                       | 0.901                                                      |     |
| 1.03                                     | 13.3           | 223                           | 39.7                                       | 0.816                                                      | 1950                  | 103                                        | 0.860                                                      |     |
| 1.08                                     | 13.4           | 161                           | 29.7                                       | 0.843                                                      | 906                   | 180                                        | 0.825                                                      |     |
| 1.13                                     | 13.6           | 148                           | 23.4                                       | 0.864                                                      | 385                   | 268                                        | 0.807                                                      |     |
| 1.18                                     | 13.6           | 177                           | 21.3                                       | 0.872                                                      | 195                   | 290                                        | 0.822                                                      |     |
| 1.23                                     | 13.7           | 252                           | 21.2                                       | 0.870                                                      | 131                   | 232                                        | 0.878                                                      |     |
| 1.28                                     | 13.7           | 368                           | 21.2                                       | 0.867                                                      | 118                   | 144                                        | 0.947                                                      |     |
| 1.33                                     | 13.7           | 499                           | 21.7                                       | 0.862                                                      | 121                   | 89.2                                       | 1.00                                                       |     |
| 1.38                                     | 13.6           | 564                           | 22.1                                       | 0.857                                                      | 147                   | 58.9                                       | 1.00                                                       |     |
| 1.43                                     | 13.6           | 535                           | 21.5                                       | 0.857                                                      | 188                   | 41.7                                       | 0.997                                                      |     |
| 1.48                                     | 13.6           | 477                           | 21.0                                       | 0.857                                                      | 199                   | 44.8                                       | 0.962                                                      |     |
| 1.53                                     | 13.6           | 411                           | 20.2                                       | 0.859                                                      | 191                   | 51.1                                       | 0.930                                                      |     |

| $\alpha$ -Fe <sub>2</sub> O <sub>3</sub> /CoPi electrode |                               | High frequency                             |                                                            |       | Low frequency                              |                                                            |       |
|----------------------------------------------------------|-------------------------------|--------------------------------------------|------------------------------------------------------------|-------|--------------------------------------------|------------------------------------------------------------|-------|
| $E$ vs RHE                                               | $R_{\text{sol}}$ [ $\Omega$ ] | CPE <sup>bulk</sup>                        |                                                            |       | CPE <sup>surf</sup>                        |                                                            |       |
|                                                          |                               | $R_{\text{ct}}^{\text{bulk}}$ [ $\Omega$ ] | $T_{\text{CPE}}^{\text{bulk}}$ [ $\mu\text{F s}^{(p-1)}$ ] | $p$   | $R_{\text{ct}}^{\text{surf}}$ [ $\Omega$ ] | $T_{\text{CPE}}^{\text{surf}}$ [ $\mu\text{F s}^{(p-1)}$ ] | $p$   |
| 0.68                                                     | 13.6                          | 96.4                                       | 62.3                                                       | 0.846 | 5100                                       | 92.7                                                       | 0.735 |
| 0.73                                                     | 13.3                          | 91.9                                       | 67.5                                                       | 0.821 | 2730                                       | 153                                                        | 0.831 |
| 0.78                                                     | 13.4                          | 76.1                                       | 47.7                                                       | 0.851 | 654                                        | 225                                                        | 0.863 |
| 0.83                                                     | 13.5                          | 97.8                                       | 37.0                                                       | 0.875 | 270                                        | 279                                                        | 0.851 |
| 0.88                                                     | 13.6                          | 186                                        | 30.4                                                       | 0.895 | 232                                        | 251                                                        | 0.838 |
| 0.93                                                     | 13.7                          | 385                                        | 26.2                                                       | 0.909 | 269                                        | 187                                                        | 0.829 |
| 0.98                                                     | 13.8                          | 631                                        | 24.4                                                       | 0.914 | 301                                        | 154                                                        | 0.830 |
| 1.03                                                     | 13.8                          | 740                                        | 24.0                                                       | 0.914 | 340                                        | 153                                                        | 0.760 |
| 1.08                                                     | 13.8                          | 708                                        | 24.3                                                       | 0.911 | 409                                        | 191                                                        | 0.646 |
| 1.13                                                     | 13.7                          | 676                                        | 25.7                                                       | 0.905 | 404                                        | 193                                                        | 0.634 |
| 1.18                                                     | 13.7                          | 594                                        | 27.0                                                       | 0.899 | 417                                        | 167                                                        | 0.628 |
| 1.23                                                     | 13.7                          | 511                                        | 28.8                                                       | 0.893 | 420                                        | 167                                                        | 0.603 |
| 1.28                                                     | 13.7                          | 451                                        | 30.3                                                       | 0.888 | 380                                        | 162                                                        | 0.623 |
| 1.33                                                     | 13.7                          | 390                                        | 30.8                                                       | 0.887 | 349                                        | 168                                                        | 0.629 |
| 1.38                                                     | 13.6                          | 367                                        | 31.4                                                       | 0.883 | 287                                        | 199                                                        | 0.635 |
| 1.43                                                     | 13.6                          | 356                                        | 30.5                                                       | 0.884 | 232                                        | 248                                                        | 0.638 |
| 1.48                                                     | 13.6                          | 347                                        | 28.0                                                       | 0.888 | 192                                        | 274                                                        | 0.658 |
| 1.53                                                     | 13.6                          | 353                                        | 25.0                                                       | 0.896 | 160                                        | 313                                                        | 0.662 |
